# Supplementary material for: Optimization of Extraction Process, Structure Characterization, and Antioxidant Activity of Polysaccharides from Different Parts of Camellia oleifera Abel
Source: MDPI journal article supplement (doi:10.3390/foods11203185), 2022-10-12
Supplement: s1 [file s1]

## Supplementary Materials

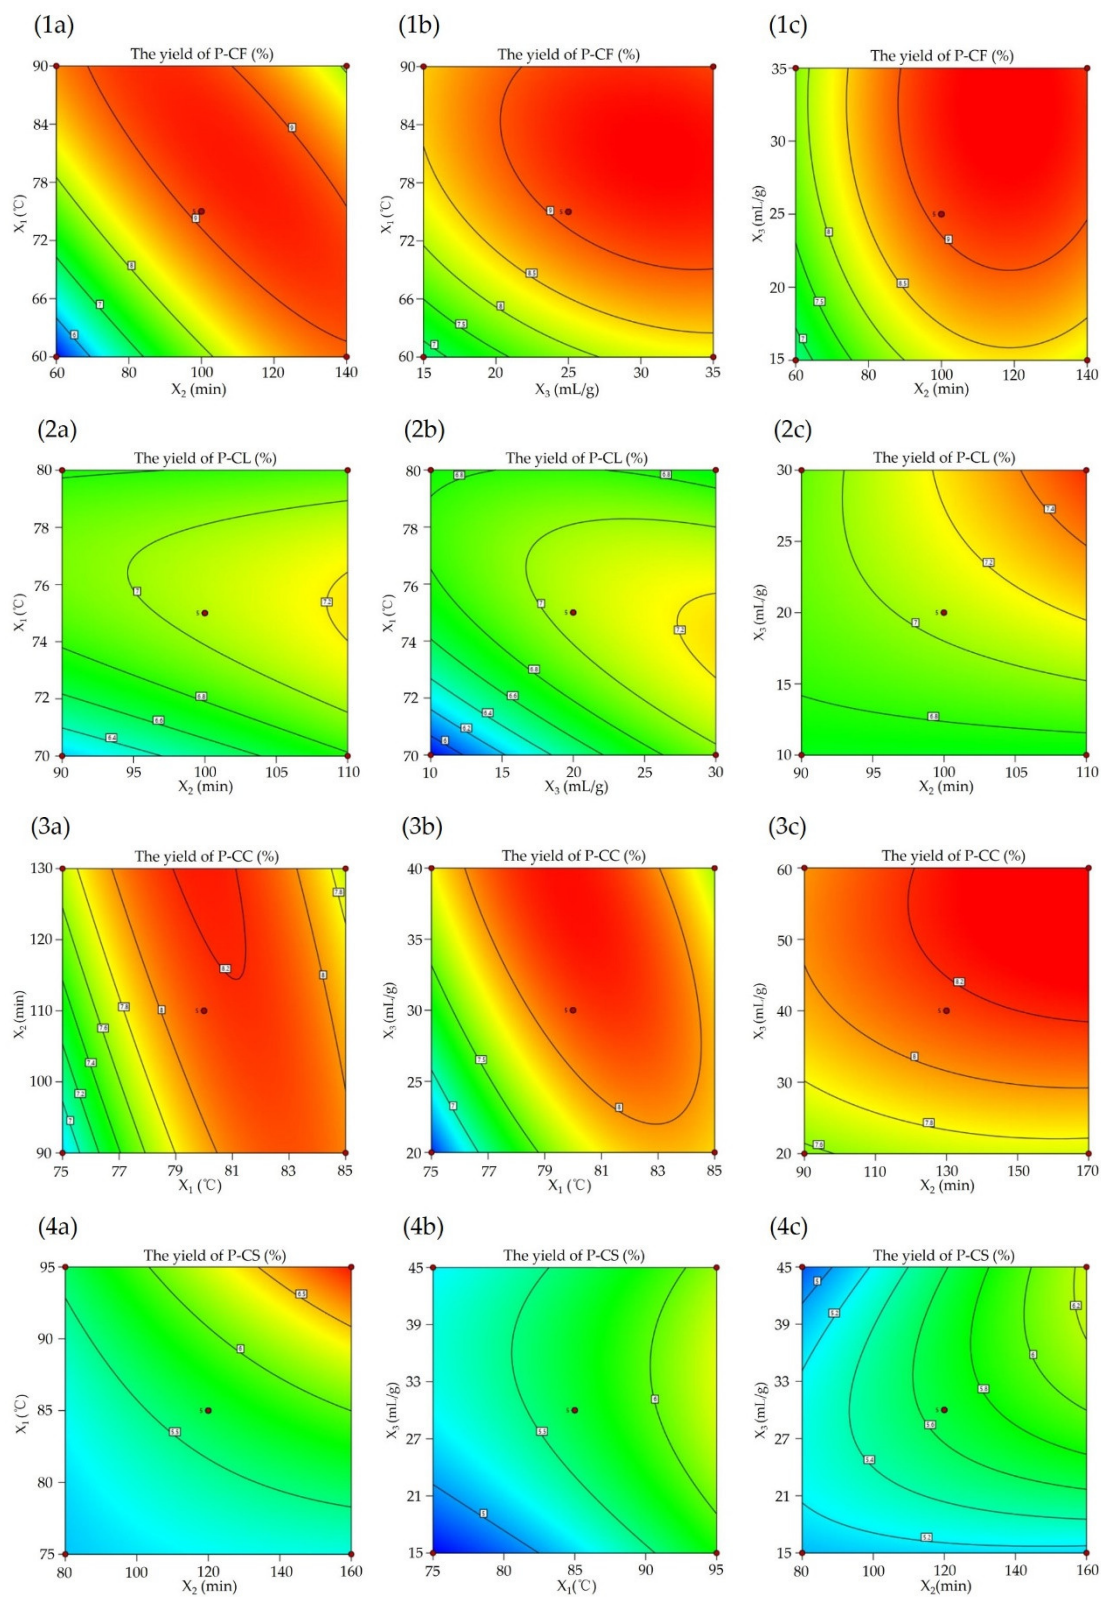

**Figure S1.** Contour plots of P-CF, P-CL, P-CC and P-CS. Contour plots of the interactions between (a) extraction temperature and extraction time, (b) extraction temperature and liquid-solid ratio, (c) extraction time and liquid-solid ratio (for (1) P-CF, (2) P-CL, (3) P-CC, (4) P-CS).  $X_1$ ,  $X_2$  and  $X_3$  represent the extraction temperature, extraction time and Liquid-Solid Ratio, respectively.
